# Supplementary material for: Lifestyle medicine for type 2 diabetes: practice-based evidence for long-term efficacy of a multicomponent lifestyle intervention (Reverse Diabetes2 Now)
Source: PubMed Central journal article supplement — BMJ Nutr Prev Health. 2020 Aug 18;3(2):188–95. doi: 10.1136/bmjnph-2020-000081 (PMC7841830; doi:10.1136/bmjnph-2020-000081), 2020-08-18
Supplement: bmjnph-2020-000081supp002.pdf [file bmjnph-2020-000081supp002.pdf]

## 1 SUPPLEMENTARY TABLES AND FIGURES

2 | Supplementary Table 1. [Cross table of](#) Number of participants per medication class at baseline and 24 months  
 3 (n=234) and per subgroups, 1) per baseline HbA1c level categorie (< or > 7.0% (53mmol/mol)); 2) per SES group  
 4 (low, middle, high)

| Baseline                               | 24 months     |            |                         |                                   | Subtotal   |
|----------------------------------------|---------------|------------|-------------------------|-----------------------------------|------------|
|                                        | No medication | Metformin  | Metformin + SU-derivate | Metformin + SU-derivate + Insulin |            |
| No medication                          | 0             | 0          | 0                       | 0                                 | 0          |
| Metformin                              | 34            | 31         | 2                       | 1                                 | 68         |
| Metformin + SU-derivative              | 20            | 56         | 22                      | 2                                 | 100        |
| Metformin + SU-derivative + Insulin    | 11            | 19         | 17                      | 19                                | 66         |
| <i>Subtotal</i>                        | <i>65</i>     | <i>106</i> | <i>41</i>               | <i>22</i>                         | <i>234</i> |
| <i>1. HbA1c baseline category</i>      |               |            |                         |                                   |            |
| <i>≤ 53 mmol/mol</i>                   |               |            |                         |                                   |            |
| No medication                          | 0             | 0          | 0                       | 0                                 | 0          |
| Metformin                              | 22            | 16         | 0                       | 1                                 | 39         |
| Metformin + SU-derivative              | 14            | 20         | 9                       | 1                                 | 44         |
| Metformin + SU-derivative + Insulin    | 6             | 6          | 4                       | 7                                 | 23         |
| <i>Subtotal</i>                        | <i>42</i>     | <i>42</i>  | <i>13</i>               | <i>9</i>                          | <i>106</i> |
| <i>HbA1c baseline &gt; 53 mmol/mol</i> |               |            |                         |                                   |            |
| No medication                          | 0             | 0          | 0                       | 0                                 | 0          |
| Metformin                              | 12            | 15         | 2                       | 0                                 | 29         |
| Metformin + SU-derivative              | 6             | 36         | 13                      | 1                                 | 56         |
| Metformin + SU-derivative + Insulin    | 5             | 13         | 13                      | 12                                | 43         |
| <i>Subtotal</i>                        | <i>23</i>     | <i>64</i>  | <i>28</i>               | <i>13</i>                         | <i>128</i> |
| <i>2. SES category</i>                 |               |            |                         |                                   |            |
| <i>Low SES</i>                         |               |            |                         |                                   |            |
| No medication                          | 0             | 0          | 0                       | 0                                 | 0          |
| Metformin                              | 9             | 5          | 0                       | 0                                 | 14         |
| Metformin + SU-derivative              | 7             | 20         | 6                       | 0                                 | 33         |
| Metformin + SU-derivative + Insulin    | 1             | 5          | 3                       | 1                                 | 10         |
| <i>Subtotal</i>                        | <i>17</i>     | <i>30</i>  | <i>9</i>                | <i>1</i>                          | <i>57</i>  |
| <i>Middle SES</i>                      |               |            |                         |                                   |            |
| No medication                          | 0             | 0          | 0                       | 0                                 | 0          |
| Metformin                              | 7             | 9          | 1                       | 0                                 | 17         |
| Metformin + SU-derivative              | 5             | 11         | 12                      | 0                                 | 28         |
| Metformin + SU-derivative + Insulin    | 5             | 2          | 10                      | 7                                 | 24         |
| <i>Subtotal</i>                        | <i>17</i>     | <i>22</i>  | <i>23</i>               | <i>7</i>                          | <i>69</i>  |
| <i>High SES</i>                        |               |            |                         |                                   |            |
| No medication                          | 0             | 0          | 0                       | 0                                 | 0          |
| Metformin                              | 18            | 17         | 1                       | 1                                 | 37         |
| Metformin + SU-derivative              | 8             | 25         | 3                       | 2                                 | 38         |
| Metformin + SU-derivative + Insulin    | 5             | 12         | 4                       | 10                                | 31         |
| <i>Subtotal</i>                        | <i>31</i>     | <i>54</i>  | <i>8</i>                | <i>13</i>                         | <i>106</i> |

5 \* p chi square <0.001

6

7 Supplementary Table 2. Mean levels  $\pm$  SD and change of HbA1c in percentage (mmol/mol) at baseline and at 24  
 8 months, including subgroup analyses per baseline medication category (low vs. high), HbA1c levels ( $\leq$  or  $>$  53  
 9 mmol/mol) or SES (low, middle or high)

|                                                      | <i>N</i> | <i>Baseline</i> | <i>24 months</i> | <i>Mean difference</i> | <i>P value paired t-test</i> | <i>P value repeated measures *</i> |
|------------------------------------------------------|----------|-----------------|------------------|------------------------|------------------------------|------------------------------------|
| HbA1c in mmol/mol                                    | 234      | 56.3 $\pm$ 10.5 | 55.6 $\pm$ 12.8  | -0.7 $\pm$ 12.9        | 0.430                        | 0.002                              |
| <i>Subgroup analyses</i>                             |          |                 |                  |                        |                              |                                    |
| HbA1c baseline $\leq$ 53 mmol/mol                    | 106      | 47.3 $\pm$ 4.1  | 51.5 $\pm$ 9.9   | 4.2 $\pm$ 9.5          | <0.001                       | NA                                 |
| HbA1c baseline $>$ 53 mmol/mol                       | 128      | 63.7 $\pm$ 8.0  | 59.0 $\pm$ 13.9  | -4.7 $\pm$ 13.9        | <0.001                       | NA                                 |
|                                                      |          |                 |                  |                        |                              | NA                                 |
| Medication use baseline metformin only               | 68       | 52.4 $\pm$ 9.3  | 48.8 $\pm$ 8.0   | -3.6 $\pm$ 9.3         | 0.002                        | NA                                 |
| Medication use baseline SU-derivative and/or insulin | 166      | 57.9 $\pm$ 10.6 | 58.4 $\pm$ 13.3  | 0.5 $\pm$ 13.9         | 0.623                        | NA                                 |
|                                                      |          |                 |                  |                        |                              | NA                                 |
| SES low #                                            | 57       | 55.4 $\pm$ 9.3  | 54.8 $\pm$ 11.5  | -0.6 $\pm$ 13.7        | 0.743                        | NA                                 |
| SES middle                                           | 69       | 58.3 $\pm$ 12.2 | 58.5 $\pm$ 15.7  | 0.1 $\pm$ 13.7         | 0.930                        | NA                                 |
| SES high                                             | 106      | 55.6 $\pm$ 9.8  | 54.2 $\pm$ 11.1  | -1.4 $\pm$ 12.0        | 0.243                        | NA                                 |

10 \* for generalized linear models (GLM) repeated measures data at baseline, 6m, 12m, 18m, and 24m were included;

11 NA: not applicable (sample size too small).

12 #SES missing for n=2

13 Supplementary Table 3A. Secondary outcomes per subgroup of baseline HbA1c values ( $\leq$  or  $>$  53 mmol/mol): Mean  
 14 levels (SD) and change of health parameters, self-perceived health, quality of life, and fatigue at baseline and 24  
 15 months

|                                                                | <i>N</i> | <i>Baseline</i> | <i>24 months</i> | <i>Mean difference<br/>(24m vs. baseline)</i> | <i>paired sample t-test</i> |
|----------------------------------------------------------------|----------|-----------------|------------------|-----------------------------------------------|-----------------------------|
|                                                                |          | Mean (SD)       | Mean (SD)        | Mean (SD)                                     | P-value                     |
| <i>Baseline HbA1c levels<br/><math>\leq</math> 53 mmol/mol</i> |          |                 |                  |                                               |                             |
| Fasting glucose (mmol/L)                                       | 75       | 7.71 (1.46)     | 8.09 (1.87)      | 0.38 (2.11)                                   | 0.125                       |
| Total cholesterol (mmol/L)                                     | 65       | 4.71 (1.21)     | 4.92 (1.23)      | 0.21 (1.19)                                   | 0.163                       |
| HDL (mmol/L)                                                   | 67       | 1.29 (0.50)     | 1.47 (0.59)      | 0.18 (0.72)                                   | 0.048                       |
| LDL (mmol/L)                                                   | 74       | 2.58 (1.00)     | 2.81 (1.07)      | 0.22 (1.09)                                   | 0.082                       |
| Total cholesterol/HDL ratio                                    | 62       | 3.85 (1.27)     | 3.65 (1.13)      | -0.21 (1.42)                                  | 0.256                       |
| Triglycerides (mmol/L)                                         | 63       | 1.97 (1.07)     | 1.70 (1.02)      | -0.27 (1.17)                                  | 0.074                       |
| Body weight (kg)                                               | 83       | 91.6 (16.4)     | 85.5 (15.6)      | -6.04 (6.85)                                  | <0.001                      |
| BMI (kg/m <sup>2</sup> )                                       | 83       | 30.8 (4.6)      | 28.7 (4.4)       | -2.03 (2.28)                                  | <0.001                      |
| Waist circumference (cm)                                       | 54       | 108.0 (11.9)    | 100.9 (11.7)     | -7.11 (8.45)                                  | <0.001                      |
| Health                                                         | 89       | 7.15 (1.23)     | 7.51 (1.66)      | 0.36 (1.65)                                   | 0.042                       |
| Quality of life                                                | 89       | 7.49 (1.20)     | 7.73 (1.35)      | 0.24 (1.40)                                   | 0.115                       |
| Fatigue (CIS-score)                                            | 89       | 60.9 (23.3)     | 52.2 (24.1)      | -8.65 (20.8)                                  | <0.001                      |
| <i>Baseline HbA1c levels<br/>&gt; 53 mmol/mol</i>              |          |                 |                  |                                               |                             |
| Fasting glucose (mmol/L)                                       | 76       | 9.61 (2.27)     | 9.47 (2.80)      | -0.14 (2.88)                                  | 0.665                       |
| Total cholesterol (mmol/L)                                     | 71       | 4.56 (1.16)     | 4.76 (1.21)      | 0.20 (1.28)                                   | 0.196                       |
| HDL (mmol/L)                                                   | 72       | 1.21 (0.32)     | 1.39 (0.45)      | 0.17 (0.27)                                   | <0.001                      |
| LDL (mmol/L)                                                   | 81       | 2.59 (1.00)     | 2.72 (1.04)      | 0.13 (1.03)                                   | 0.252                       |
| Total cholesterol/HDL ratio                                    | 64       | 3.96 (1.17)     | 3.72 (1.43)      | -0.24 (1.05)                                  | 0.070                       |
| Triglycerides (mmol/L)                                         | 71       | 2.15 (1.38)     | 1.75 (1.24)      | -0.40 (0.87)                                  | <0.001                      |
| Body weight (kg)                                               | 96       | 96.2 (14.5)     | 88.4 (13.9)      | -7.89 (6.76)                                  | <0.001                      |
| BMI (kg/m <sup>2</sup> )                                       | 96       | 31.8 (4.0)      | 29.2 (3.7)       | -2.64 (2.26)                                  | <0.001                      |
| Waist circumference (cm)                                       | 57       | 112.7 (12.1)    | 104.1 (10.4)     | -8.6 (1.06)                                   | <0.001                      |
| Health                                                         | 106      | 6.71 (1.26)     | 7.18 (1.58)      | 0.47 (1.35)                                   | <0.001                      |
| Quality of life                                                | 106      | 7.25 (1.22)     | 7.57 (1.51)      | 0.32 (1.28)                                   | 0.012                       |
| Fatigue (CIS-score)                                            | 106      | 67.2 (23.1)     | 56.9 (24.5)      | -10.3 (20.7)                                  | <0.001                      |

16

17

- 18 Supplementary Table 3B. Secondary outcomes per subgroup of baseline GLmed category (only metformin or high):  
 19 Mean scores (SD) and change of health parameters, self-perceived health, quality of life, and fatigue at baseline  
 20 and 24 months.

|                                             | <i>N</i> | <i>Baseline</i> | <i>24 months</i> | <i>mean difference<br/>(24m vs. baseline)</i> | <i>paired sample t-test</i> |
|---------------------------------------------|----------|-----------------|------------------|-----------------------------------------------|-----------------------------|
|                                             |          | Mean (SD)       | Mean (SD)        | Mean (SD)                                     | P-value                     |
| <i>Baseline GLmed – only metformin</i>      |          |                 |                  |                                               |                             |
| Fasting glucose (mmol/L)                    | 44       | 8.35 (1.48)     | 7.89 (1.88)      | -0.46 (1.59)                                  | 0.063                       |
| Total cholesterol (mmol/L)                  | 42       | 4.88 (1.40)     | 5.01 (1.19)      | 0.13 (1.23)                                   | 0.511                       |
| HDL (mmol/L)                                | 42       | 1.27 (0.33)     | 1.53 (0.67)      | 0.26 (0.70)                                   | 0.021                       |
| LDL (mmol/L)                                | 48       | 2.75 (1.17)     | 2.92 (1.03)      | 0.17 (1.03)                                   | 0.246                       |
| Total cholesterol/HDL ratio                 | 41       | 4.00 (1.37)     | 3.63 (1.00)      | -0.37 (1.02)                                  | 0.025                       |
| Triglycerides (mmol/L)                      | 40       | 1.96 (0.90)     | 1.54 (0.66)      | -0.41 (0.74)                                  | 0.001                       |
| Body weight (kg)                            | 54       | 93.5 (16.1)     | 88.7 (15.8)      | -4.73 (6.55)                                  | <0.001                      |
| BMI (kg/m <sup>2</sup> )                    | 54       | 31.3 (4.66)     | 29.7 (4.49)      | -1.61 (2.23)                                  | <0.001                      |
| Waist circumference (cm)                    | 38       | 108.5 (12.1)    | 103.1 (12.6)     | -5.4 (8.1)                                    | <0.001                      |
| Health                                      | 61       | 6.80 (1.42)     | 7.03 (1.94)      | -0.23 (1.54)                                  | 0.250                       |
| Quality of life                             | 61       | 7.33 (1.18)     | 7.36 (1.65)      | 0.03 (1.45)                                   | 0.860                       |
| Fatigue (CIS-score)                         | 61       | 64.6 (25.5)     | 60.3 (27.5)      | -4.4 (19.9)                                   | 0.092                       |
| <i>Baseline GLmed – high medication use</i> |          |                 |                  |                                               |                             |
| Fasting glucose (mmol/L)                    | 107      | 8.80 (2.34)     | 9.15 (2.61)      | 0.35 (2.81)                                   | 0.198                       |
| Total cholesterol (mmol/L)                  | 94       | 4.52 (1.06)     | 4.76 (1.23)      | 0.24 (1.24)                                   | 0.066                       |
| HDL (mmol/L)                                | 97       | 1.24 (0.46)     | 1.38 (0.43)      | 0.14 (0.45)                                   | 0.004                       |
| LDL (mmol/L)                                | 107      | 2.51 (0.91)     | 2.69 (1.06)      | 0.18 (1.07)                                   | 0.092                       |
| Total cholesterol/HDL ratio                 | 85       | 3.87 (1.14)     | 3.71 (1.41)      | -0.15 (1.33)                                  | 0.291                       |
| Triglycerides (mmol/L)                      | 94       | 2.11 (1.37)     | 1.80 (1.29)      | -0.31 (1.12)                                  | 0.009                       |
| Body weight (kg)                            | 125      | 94.4 (15.4)     | 86.3 (14.2)      | -8.0 (6.7)                                    | <0.001                      |
| BMI (kg/m <sup>2</sup> )                    | 125      | 31.4 (4.1)      | 28.7 (3.8)       | -2.68 (2.23)                                  | <0.001                      |
| Waist circumference (cm)                    | 73       | 111.3 (12.2)    | 102.2 (10.4)     | -9.14 (8.07)                                  | <0.001                      |
| Health                                      | 134      | 6.96 (1.18)     | 7.46 (1.44)      | 0.51 (1.47)                                   | <0.001                      |
| Quality of life                             | 134      | 7.37 (1.23)     | 7.77 (1.32)      | 0.40 (1.27)                                   | <0.001                      |
| Fatigue (CIS-score)                         | 134      | 64.1 (22.4)     | 52.3 (22.5)      | -11.9 (20.7)                                  | <0.001                      |

21

22

23

24

- 25 Supplementary Table 3C. Secondary outcomes per subgroup of SES category (low, middle or high): Mean scores  
 26 (SD) and change of health parameters, self-perceived health, quality of life, and fatigue at baseline and 24 months.

|                             | <i>N</i> | <i>Baseline</i> | <i>24 months</i> | <i>Mean difference (24m vs. baseline)</i> | <i>Statistical significance paired sample t-test</i> |
|-----------------------------|----------|-----------------|------------------|-------------------------------------------|------------------------------------------------------|
|                             |          | Mean (SD)       | Mean (SD)        | Mean (SD)                                 | P-value                                              |
| <i>Low SES</i>              |          |                 |                  |                                           |                                                      |
| Fasting glucose (mmol/L)    | 39       | 8.75 (2.09)     | 8.16 (1.98)      | -0.59 (2.45)                              | 0.143                                                |
| Total cholesterol (mmol/L)  | 37       | 4.75 (1.27)     | 4.95 (1.22)      | 0.19 (1.20)                               | 0.331                                                |
| HDL (mmol/L)                | 37       | 1.25 (0.36)     | 1.47 (0.54)      | 0.23 (0.34)                               | <0.0001                                              |
| LDL (mmol/L)                | 42       | 2.62 (1.05)     | 2.90 (1.00)      | 0.28 (1.15)                               | 0.119                                                |
| Total cholesterol/HDL ratio | 33       | 3.92 (1.41)     | 3.48 (1.01)      | -0.44 (1.14)                              | 0.034                                                |
| Triglycerides (mmol/L)      | 37       | 2.07 (1.25)     | 1.51 (0.78)      | -0.56 (0.98)                              | 0.001                                                |
| Body weight (kg)            | 48       | 92.3 (15.8)     | 85.8 (14.8)      | -6.5 (6.3)                                | <0.001                                               |
| BMI (kg/m <sup>2</sup> )    | 48       | 31.4 (4.0)      | 29.2 (3.8)       | -2.2 (2.1)                                | <0.001                                               |
| Waist circumference (cm)    | 29       | 109.1 (12.7)    | 101.1 (10.8)     | -7.98 (9.06)                              | <0.001                                               |
| Health                      | 51       | 7.06 (1.26)     | 7.84 (1.33)      | 0.78 (1.27)                               | <0.0001                                              |
| Quality of life             | 51       | 7.49 (1.12)     | 7.84 (1.43)      | 0.35 (1.02)                               | 0.017                                                |
| Fatigue (CIS-score)         | 51       | 63.2 (26.2)     | 47.2 (23.3)      | -16.0 (19.0)                              | <0.001                                               |
| <i>Middle SES</i>           |          |                 |                  |                                           |                                                      |
| Fasting glucose (mmol/L)    | 45       | 9.17 (2.64)     | 9.26 (2.77)      | 0.09 (2.35)                               | 0.796                                                |
| Total cholesterol (mmol/L)  | 40       | 4.52 (1.24)     | 4.84 (1.34)      | 0.32 (1.44)                               | 0.169                                                |
| HDL (mmol/L)                | 42       | 1.21 (0.31)     | 1.39 (0.69)      | 0.18 (0.69)                               | 0.095                                                |
| LDL (mmol/L)                | 44       | 2.59 (1.06)     | 2.78 (1.20)      | 0.19 (1.09)                               | 0.257                                                |
| Total cholesterol/HDL ratio | 37       | 4.01 (1.18)     | 4.07 (1.55)      | 0.06 (1.21)                               | 0.765                                                |
| Triglycerides (mmol/L)      | 41       | 2.10 (1.61)     | 1.93 (1.45)      | -0.18 (0.91)                              | 0.221                                                |
| Body weight (kg)            | 51       | 97.2 (16.7)     | 88.9 (16.3)      | -8.3 (7.7)                                | <0.001                                               |
| BMI (kg/m <sup>2</sup> )    | 51       | 32.1 (4.5)      | 29.4 (4.5)       | -2.7 (2.5)                                | <0.001                                               |
| Waist circumference (cm)    | 32       | 114.4 (12.2)    | 104.5 (12.1)     | -10.0 (8.5)                               | <0.001                                               |
| Health                      | 56       | 6.95 (1.24)     | 7.36 (1.83)      | 0.41 (1.66)                               | 0.069                                                |
| Quality of life             | 56       | 7.38 (1.24)     | 7.79 (1.66)      | 0.41 (1.39)                               | 0.031                                                |
| Fatigue (CIS-score)         | 56       | 67.0 (22.6)     | 57.1 (28.1)      | -9.9 (22.2)                               | 0.002                                                |
| <i>High SES</i>             |          |                 |                  |                                           |                                                      |
| Fasting glucose (mmol/L)    | 67       | 8.29 (1.69)     | 8.83 (2.50)      | 0.54 (2.64)                               | 0.098                                                |
| Total cholesterol (mmol/L)  | 58       | 4.64 (1.10)     | 4.78 (1.15)      | 0.14 (1.13)                               | 0.365                                                |
| HDL (mmol/L)                | 59       | 1.28 (0.51)     | 1.40 (0.35)      | 0.14 (0.52)                               | 0.047                                                |
| LDL (mmol/L)                | 68       | 2.58 (0.95)     | 2.68 (0.99)      | 0.10 (0.99)                               | 0.397                                                |
| Total cholesterol/HDL ratio | 55       | 3.86 (1.12)     | 3.57 (1.20)      | -0.29 (1.31)                              | 0.104                                                |
| Triglycerides (mmol/L)      | 55       | 2.06 (0.89)     | 1.74 (1.07)      | -0.32 (1.12)                              | 0.039                                                |
| Body weight (kg)            | 79       | 93.3 (14.6)     | 86.6 (13.7)      | -6.7 (6.5)                                | <0.001                                               |
| BMI (kg/m <sup>2</sup> )    | 79       | 30.9 (4.2)      | 28.7 (3.8)       | -2.2 (2.2)                                | <0.001                                               |
| Waist circumference (cm)    | 49       | 108.7 (11.5)    | 102.1 (10.8)     | -6.6 (7.4)                                | <0.001                                               |
| Health                      | 88       | 6.80 (1.28)     | 7.01 (1.56)      | 0.25 (1.47)                               | 0.173                                                |
| Quality of life             | 88       | 7.27 (1.25)     | 7.43 (1.28)      | 0.16 (1.46)                               | 0.310                                                |
| Fatigue (CIS-score)         | 88       | 63.2 (22.2)     | 57.6 (21.7)      | -5.6 (19.9)                               | 0.010                                                |

27
